# Supplementary material
Source: publisher figshare collection journal article supplement (https://gsajournals.figshare.com/articles/dataset/_/11971941)
Supplement: Supplementary file 3 [file 1]

MiniMUGA Background Analysis v0008

| Sample ID                                      | KM_C2Cl2_F                                                                                                                                                                                                                                                                                                                                                                                                                                   |               |              |              |          |      |        |        |        |      |      |     |      |      |      |     |        |       |            |              |              |          |           |        |               |          |          |      |     |      |      |      |     |   |   |   |   |   |   |   |   |   |   |   |   |   |   |   |   |   |
|------------------------------------------------|----------------------------------------------------------------------------------------------------------------------------------------------------------------------------------------------------------------------------------------------------------------------------------------------------------------------------------------------------------------------------------------------------------------------------------------------|---------------|--------------|--------------|----------|------|--------|--------|--------|------|------|-----|------|------|------|-----|--------|-------|------------|--------------|--------------|----------|-----------|--------|---------------|----------|----------|------|-----|------|------|------|-----|---|---|---|---|---|---|---|---|---|---|---|---|---|---|---|---|---|
| Neogen ID                                      | OZ0097                                                                                                                                                                                                                                                                                                                                                                                                                                       |               |              |              |          |      |        |        |        |      |      |     |      |      |      |     |        |       |            |              |              |          |           |        |               |          |          |      |     |      |      |      |     |   |   |   |   |   |   |   |   |   |   |   |   |   |   |   |   |   |
| Summary                                        | <p>The genotype of this sample is of <b>excellent</b> quality. It is <b>female</b> and <b>inbred</b>, and likely a <b>C3HeB/FeJ</b> mouse.</p> <p>No genetic constructs were detected in this sample.</p>                                                                                                                                                                                                                                    |               |              |              |          |      |        |        |        |      |      |     |      |      |      |     |        |       |            |              |              |          |           |        |               |          |          |      |     |      |      |      |     |   |   |   |   |   |   |   |   |   |   |   |   |   |   |   |   |   |
| Genotyping Quality                             | <b>Excellent (6 N calls)</b><br>All reported results are dependent on genotyping quality.                                                                                                                                                                                                                                                                                                                                                    |               |              |              |          |      |        |        |        |      |      |     |      |      |      |     |        |       |            |              |              |          |           |        |               |          |          |      |     |      |      |      |     |   |   |   |   |   |   |   |   |   |   |   |   |   |   |   |   |   |
| Chromosomal Sex                                | XX                                                                                                                                                                                                                                                                                                                                                                                                                                           |               |              |              |          |      |        |        |        |      |      |     |      |      |      |     |        |       |            |              |              |          |           |        |               |          |          |      |     |      |      |      |     |   |   |   |   |   |   |   |   |   |   |   |   |   |   |   |   |   |
| Inbreeding Estimate                            | <b>Inbred (1 H calls at autosomal, X, and PAR chromosome markers)</b>                                                                                                                                                                                                                                                                                                                                                                        |               |              |              |          |      |        |        |        |      |      |     |      |      |      |     |        |       |            |              |              |          |           |        |               |          |          |      |     |      |      |      |     |   |   |   |   |   |   |   |   |   |   |   |   |   |   |   |   |   |
| Inbreeding and Genotyping Quality (Plot)       | 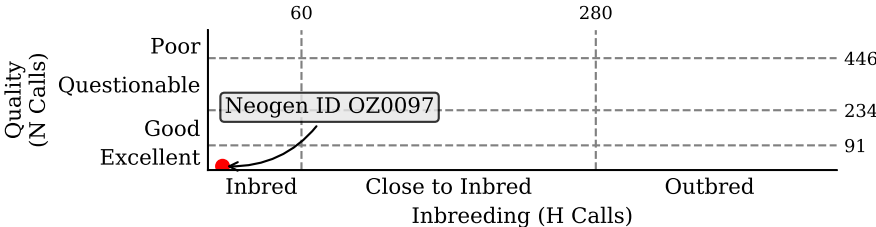                                                                                                                                                                                                                                                                                                                                                           |               |              |              |          |      |        |        |        |      |      |     |      |      |      |     |        |       |            |              |              |          |           |        |               |          |          |      |     |      |      |      |     |   |   |   |   |   |   |   |   |   |   |   |   |   |   |   |   |   |
| Constructs Detected                            | <table><tr><td>BlastR</td><td>bpa</td><td>Cas9</td><td>chlor</td><td>Cre</td><td>DTA</td><td>g_FP</td><td>hCMV_a</td><td>hCMV_b</td><td>hTK_pr</td><td>iCre</td><td>IRES</td><td>Luc</td><td>r_FP</td><td>rtTA</td><td>SV40</td><td>tTA</td></tr><tr><td>-</td><td>-</td><td>-</td><td>-</td><td>-</td><td>-</td><td>-</td><td>-</td><td>-</td><td>-</td><td>-</td><td>-</td><td>-</td><td>-</td><td>-</td><td>-</td><td>-</td></tr></table> |               |              |              |          |      |        |        |        |      |      |     |      |      |      |     | BlastR | bpa   | Cas9       | chlor        | Cre          | DTA      | g_FP      | hCMV_a | hCMV_b        | hTK_pr   | iCre     | IRES | Luc | r_FP | rtTA | SV40 | tTA | - | - | - | - | - | - | - | - | - | - | - | - | - | - | - | - | - |
| BlastR                                         | bpa                                                                                                                                                                                                                                                                                                                                                                                                                                          | Cas9          | chlor        | Cre          | DTA      | g_FP | hCMV_a | hCMV_b | hTK_pr | iCre | IRES | Luc | r_FP | rtTA | SV40 | tTA |        |       |            |              |              |          |           |        |               |          |          |      |     |      |      |      |     |   |   |   |   |   |   |   |   |   |   |   |   |   |   |   |   |   |
| -                                              | -                                                                                                                                                                                                                                                                                                                                                                                                                                            | -             | -            | -            | -        | -    | -      | -      | -      | -    | -    | -   | -    | -    | -    | -   |        |       |            |              |              |          |           |        |               |          |          |      |     |      |      |      |     |   |   |   |   |   |   |   |   |   |   |   |   |   |   |   |   |   |
| Primary Background (Autosomes, X Chromosome)   | <table><tr><th>Strain</th><th>Total</th><th>Consistent</th><th>Inconsistent</th><th>Heterozygous</th><th>Excluded</th></tr><tr><td>C3HeB/FeJ</td><td>8913</td><td>8796 (100.0%)</td><td>0 (0.0%)</td><td>1 (0.0%)</td><td>116</td></tr></table>                                                                                                                                                                                              |               |              |              |          |      |        |        |        |      |      |     |      |      |      |     | Strain | Total | Consistent | Inconsistent | Heterozygous | Excluded | C3HeB/FeJ | 8913   | 8796 (100.0%) | 0 (0.0%) | 1 (0.0%) | 116  |     |      |      |      |     |   |   |   |   |   |   |   |   |   |   |   |   |   |   |   |   |   |
| Strain                                         | Total                                                                                                                                                                                                                                                                                                                                                                                                                                        | Consistent    | Inconsistent | Heterozygous | Excluded |      |        |        |        |      |      |     |      |      |      |     |        |       |            |              |              |          |           |        |               |          |          |      |     |      |      |      |     |   |   |   |   |   |   |   |   |   |   |   |   |   |   |   |   |   |
| C3HeB/FeJ                                      | 8913                                                                                                                                                                                                                                                                                                                                                                                                                                         | 8796 (100.0%) | 0 (0.0%)     | 1 (0.0%)     | 116      |      |        |        |        |      |      |     |      |      |      |     |        |       |            |              |              |          |           |        |               |          |          |      |     |      |      |      |     |   |   |   |   |   |   |   |   |   |   |   |   |   |   |   |   |   |
| Secondary Background (Autosomes, X Chromosome) | Not Applicable                                                                                                                                                                                                                                                                                                                                                                                                                               |               |              |              |          |      |        |        |        |      |      |     |      |      |      |     |        |       |            |              |              |          |           |        |               |          |          |      |     |      |      |      |     |   |   |   |   |   |   |   |   |   |   |   |   |   |   |   |   |   |
| Background Ideogram                            |                                                                                                                                                                                                                                                                                                                                                          |               |              |              |          |      |        |        |        |      |      |     |      |      |      |     |        |       |            |              |              |          |           |        |               |          |          |      |     |      |      |      |     |   |   |   |   |   |   |   |   |   |   |   |   |   |   |   |   |   |
| Backgrounds Detected (Diagnostic Alleles)      | No Backgrounds Detected via Diagnostic Alleles                                                                                                                                                                                                                                                                                                                                                                                               |               |              |              |          |      |        |        |        |      |      |     |      |      |      |     |        |       |            |              |              |          |           |        |               |          |          |      |     |      |      |      |     |   |   |   |   |   |   |   |   |   |   |   |   |   |   |   |   |   |
