# Supplementary material
Source: publisher figshare collection journal article supplement (https://gsajournals.figshare.com/articles/dataset/_/11971941)
Supplement: Supplementary file 6 [file 1]

MiniMUGA Background Analysis v0008

| Sample ID                                                                                     | CS_C57BL/6_MacImm_F                                                                                                                                                                                                                                                                                                                                                                                                                                                                                                                   |               |              |              |          |                             |        |            |              |              |           |            |              |               |            |          |      |     |       |       |              |            |              |           |            |                                                                                               |   |   |    |       |   |   |   |   |   |   |   |   |   |
|-----------------------------------------------------------------------------------------------|---------------------------------------------------------------------------------------------------------------------------------------------------------------------------------------------------------------------------------------------------------------------------------------------------------------------------------------------------------------------------------------------------------------------------------------------------------------------------------------------------------------------------------------|---------------|--------------|--------------|----------|-----------------------------|--------|------------|--------------|--------------|-----------|------------|--------------|---------------|------------|----------|------|-----|-------|-------|--------------|------------|--------------|-----------|------------|-----------------------------------------------------------------------------------------------|---|---|----|-------|---|---|---|---|---|---|---|---|---|
| Neogen ID                                                                                     | AL3794                                                                                                                                                                                                                                                                                                                                                                                                                                                                                                                                |               |              |              |          |                             |        |            |              |              |           |            |              |               |            |          |      |     |       |       |              |            |              |           |            |                                                                                               |   |   |    |       |   |   |   |   |   |   |   |   |   |
| Summary                                                                                       | The genotype of this sample is of <b>excellent</b> quality. It is <b>female</b> and <b>inbred</b> , and likely a <b>C57BL/6J</b> mouse.                                                                                                                                                                                                                                                                                                                                                                                               |               |              |              |          |                             |        |            |              |              |           |            |              |               |            |          |      |     |       |       |              |            |              |           |            |                                                                                               |   |   |    |       |   |   |   |   |   |   |   |   |   |
|                                                                                               | Diagnostic SNPs indicate the presence of the background strain groups <b>C57BL/6</b> and the substrains <b>C57BL/6J</b> .                                                                                                                                                                                                                                                                                                                                                                                                             |               |              |              |          |                             |        |            |              |              |           |            |              |               |            |          |      |     |       |       |              |            |              |           |            |                                                                                               |   |   |    |       |   |   |   |   |   |   |   |   |   |
|                                                                                               | No genetic constructs were detected in this sample.                                                                                                                                                                                                                                                                                                                                                                                                                                                                                   |               |              |              |          |                             |        |            |              |              |           |            |              |               |            |          |      |     |       |       |              |            |              |           |            |                                                                                               |   |   |    |       |   |   |   |   |   |   |   |   |   |
| Genotyping Quality                                                                            | <b>Excellent (4 N calls)</b><br>All reported results are dependent on genotyping quality.                                                                                                                                                                                                                                                                                                                                                                                                                                             |               |              |              |          |                             |        |            |              |              |           |            |              |               |            |          |      |     |       |       |              |            |              |           |            |                                                                                               |   |   |    |       |   |   |   |   |   |   |   |   |   |
| Chromosomal Sex                                                                               | XX                                                                                                                                                                                                                                                                                                                                                                                                                                                                                                                                    |               |              |              |          |                             |        |            |              |              |           |            |              |               |            |          |      |     |       |       |              |            |              |           |            |                                                                                               |   |   |    |       |   |   |   |   |   |   |   |   |   |
| Inbreeding Estimate                                                                           | <b>Inbred (5 H calls at autosomal, X, and PAR chromosome markers)</b>                                                                                                                                                                                                                                                                                                                                                                                                                                                                 |               |              |              |          |                             |        |            |              |              |           |            |              |               |            |          |      |     |       |       |              |            |              |           |            |                                                                                               |   |   |    |       |   |   |   |   |   |   |   |   |   |
| Inbreeding and Genotyping Quality (Plot)                                                      | <p>The plot shows the relationship between Inbreeding (H Calls) on the x-axis and Quality (N Calls) on the y-axis. The y-axis has four levels: Excellent (91), Good (234), Questionable (446), and Poor (446). The x-axis has three regions: Inbred, Close to Inbred, and Outbred. A curve starts at the bottom left and rises towards the top right. A box labeled 'Neogen ID AL3794' is positioned at the 'Excellent' level, indicating the sample's quality.</p>                                                                   |               |              |              |          |                             |        |            |              |              |           |            |              |               |            |          |      |     |       |       |              |            |              |           |            |                                                                                               |   |   |    |       |   |   |   |   |   |   |   |   |   |
| Constructs Detected                                                                           | <table><tr><td>BlastR</td><td>bpa</td><td>Cas9</td><td>chlor</td><td>Cre</td><td>DTA</td><td>g_FFP</td><td>hCMV_a</td><td>hCMV_b</td><td>hTK_pr</td><td>iCre</td><td>IRE5</td><td>Luc</td><td>r_FFP</td><td>rtTA</td><td>SV40</td><td>tTA</td></tr><tr><td>-</td><td>-</td><td>-</td><td>-</td><td>-</td><td>-</td><td>-</td><td>-</td><td>-</td><td>-</td><td>-</td><td>-</td><td>-</td><td>-</td><td>-</td><td>-</td><td>-</td></tr></table>                                                                                        |               |              |              |          | BlastR                      | bpa    | Cas9       | chlor        | Cre          | DTA       | g_FFP      | hCMV_a       | hCMV_b        | hTK_pr     | iCre     | IRE5 | Luc | r_FFP | rtTA  | SV40         | tTA        | -            | -         | -          | -                                                                                             | - | - | -  | -     | - | - | - | - | - | - | - | - | - |
| BlastR                                                                                        | bpa                                                                                                                                                                                                                                                                                                                                                                                                                                                                                                                                   | Cas9          | chlor        | Cre          | DTA      | g_FFP                       | hCMV_a | hCMV_b     | hTK_pr       | iCre         | IRE5      | Luc        | r_FFP        | rtTA          | SV40       | tTA      |      |     |       |       |              |            |              |           |            |                                                                                               |   |   |    |       |   |   |   |   |   |   |   |   |   |
| -                                                                                             | -                                                                                                                                                                                                                                                                                                                                                                                                                                                                                                                                     | -             | -            | -            | -        | -                           | -      | -          | -            | -            | -         | -          | -            | -             | -          | -        |      |     |       |       |              |            |              |           |            |                                                                                               |   |   |    |       |   |   |   |   |   |   |   |   |   |
| Primary Background (Autosomes, X Chromosome)                                                  | <table><tr><th>Strain</th><th>Total</th><th>Consistent</th><th>Inconsistent</th><th>Heterozygous</th><th>Excluded</th></tr><tr><td>C57BL/6J</td><td>8913</td><td>8798 (100.0%)</td><td>0 (0.0%)</td><td>1 (0.0%)</td><td>114</td></tr></table>                                                                                                                                                                                                                                                                                        |               |              |              |          | Strain                      | Total  | Consistent | Inconsistent | Heterozygous | Excluded  | C57BL/6J   | 8913         | 8798 (100.0%) | 0 (0.0%)   | 1 (0.0%) | 114  |     |       |       |              |            |              |           |            |                                                                                               |   |   |    |       |   |   |   |   |   |   |   |   |   |
| Strain                                                                                        | Total                                                                                                                                                                                                                                                                                                                                                                                                                                                                                                                                 | Consistent    | Inconsistent | Heterozygous | Excluded |                             |        |            |              |              |           |            |              |               |            |          |      |     |       |       |              |            |              |           |            |                                                                                               |   |   |    |       |   |   |   |   |   |   |   |   |   |
| C57BL/6J                                                                                      | 8913                                                                                                                                                                                                                                                                                                                                                                                                                                                                                                                                  | 8798 (100.0%) | 0 (0.0%)     | 1 (0.0%)     | 114      |                             |        |            |              |              |           |            |              |               |            |          |      |     |       |       |              |            |              |           |            |                                                                                               |   |   |    |       |   |   |   |   |   |   |   |   |   |
| Secondary Background (Autosomes, X Chromosome)                                                | Not Applicable                                                                                                                                                                                                                                                                                                                                                                                                                                                                                                                        |               |              |              |          |                             |        |            |              |              |           |            |              |               |            |          |      |     |       |       |              |            |              |           |            |                                                                                               |   |   |    |       |   |   |   |   |   |   |   |   |   |
| Background Ideogram                                                                           | <p>The ideogram shows chromosome coverage for 19 autosomes and the X chromosome. The y-axis represents coverage in Mb, with markers at 100 Mb and 200 Mb. The legend indicates three types of regions: Primary (black), Inconsistent (light gray), and Heterozygous (dark gray). The Primary regions are the most prominent across all chromosomes.</p>                                                                                                                                                                               |               |              |              |          |                             |        |            |              |              |           |            |              |               |            |          |      |     |       |       |              |            |              |           |            |                                                                                               |   |   |    |       |   |   |   |   |   |   |   |   |   |
| Backgrounds Detected (Diagnostic Alleles)                                                     | <table><tr><th colspan="5">Diagnostic Alleles Observed</th></tr><tr><th>Substrain</th><th>Homozygous</th><th>Heterozygous</th><th>Potential</th><th>% Observed</th></tr><tr><td>C57BL/6J</td><td>145</td><td>2</td><td>156</td><td>94.2%</td></tr><tr><th>Strain Group</th><th>Homozygous</th><th>Heterozygous</th><th>Potential</th><th>% Observed</th></tr><tr><td>C57BL/6<br/>(B6N-Tyr/BrdCrCrl, C57BL/6J,<br/>C57BL/6JBomTac,<br/>C57BL/6JEiJ,<br/>C57BL/6JOlaHsd)</td><td>6</td><td>0</td><td>21</td><td>28.6%</td></tr></table> |               |              |              |          | Diagnostic Alleles Observed |        |            |              |              | Substrain | Homozygous | Heterozygous | Potential     | % Observed | C57BL/6J | 145  | 2   | 156   | 94.2% | Strain Group | Homozygous | Heterozygous | Potential | % Observed | C57BL/6<br>(B6N-Tyr/BrdCrCrl, C57BL/6J,<br>C57BL/6JBomTac,<br>C57BL/6JEiJ,<br>C57BL/6JOlaHsd) | 6 | 0 | 21 | 28.6% |   |   |   |   |   |   |   |   |   |
| Diagnostic Alleles Observed                                                                   |                                                                                                                                                                                                                                                                                                                                                                                                                                                                                                                                       |               |              |              |          |                             |        |            |              |              |           |            |              |               |            |          |      |     |       |       |              |            |              |           |            |                                                                                               |   |   |    |       |   |   |   |   |   |   |   |   |   |
| Substrain                                                                                     | Homozygous                                                                                                                                                                                                                                                                                                                                                                                                                                                                                                                            | Heterozygous  | Potential    | % Observed   |          |                             |        |            |              |              |           |            |              |               |            |          |      |     |       |       |              |            |              |           |            |                                                                                               |   |   |    |       |   |   |   |   |   |   |   |   |   |
| C57BL/6J                                                                                      | 145                                                                                                                                                                                                                                                                                                                                                                                                                                                                                                                                   | 2             | 156          | 94.2%        |          |                             |        |            |              |              |           |            |              |               |            |          |      |     |       |       |              |            |              |           |            |                                                                                               |   |   |    |       |   |   |   |   |   |   |   |   |   |
| Strain Group                                                                                  | Homozygous                                                                                                                                                                                                                                                                                                                                                                                                                                                                                                                            | Heterozygous  | Potential    | % Observed   |          |                             |        |            |              |              |           |            |              |               |            |          |      |     |       |       |              |            |              |           |            |                                                                                               |   |   |    |       |   |   |   |   |   |   |   |   |   |
| C57BL/6<br>(B6N-Tyr/BrdCrCrl, C57BL/6J,<br>C57BL/6JBomTac,<br>C57BL/6JEiJ,<br>C57BL/6JOlaHsd) | 6                                                                                                                                                                                                                                                                                                                                                                                                                                                                                                                                     | 0             | 21           | 28.6%        |          |                             |        |            |              |              |           |            |              |               |            |          |      |     |       |       |              |            |              |           |            |                                                                                               |   |   |    |       |   |   |   |   |   |   |   |   |   |
