# Supplementary material
Source: publisher figshare collection journal article supplement (https://gsajournals.figshare.com/articles/dataset/_/11971941)
Supplement: Supplementary file 8 [file 1]

MiniMUGA Background Analysis v0008

| Sample ID                                      | GPG_C3-Tag-T1-Luc_F                                                                                                                                                                                                                                                                                                                                                                                                                          |                             |              |              |              |              |           |                           |              |               |            |          |      |      |      |       |      |     |   |   |   |   |   |   |   |   |   |   |   |   |   |   |   |   |   |
|------------------------------------------------|----------------------------------------------------------------------------------------------------------------------------------------------------------------------------------------------------------------------------------------------------------------------------------------------------------------------------------------------------------------------------------------------------------------------------------------------|-----------------------------|--------------|--------------|--------------|--------------|-----------|---------------------------|--------------|---------------|------------|----------|------|------|------|-------|------|-----|---|---|---|---|---|---|---|---|---|---|---|---|---|---|---|---|---|
| Neogen ID                                      | MM0924                                                                                                                                                                                                                                                                                                                                                                                                                                       |                             |              |              |              |              |           |                           |              |               |            |          |      |      |      |       |      |     |   |   |   |   |   |   |   |   |   |   |   |   |   |   |   |   |   |
| Summary                                        | The genotype of this sample is of <b>excellent</b> quality. It is <b>female</b> and <b>inbred</b> , and likely a mix of <b>multiple FVB/N substrains</b> .                                                                                                                                                                                                                                                                                   |                             |              |              |              |              |           |                           |              |               |            |          |      |      |      |       |      |     |   |   |   |   |   |   |   |   |   |   |   |   |   |   |   |   |   |
|                                                | Diagnostic SNPs indicate the presence of the background substrains <b>FVB/NJ</b> .                                                                                                                                                                                                                                                                                                                                                           |                             |              |              |              |              |           |                           |              |               |            |          |      |      |      |       |      |     |   |   |   |   |   |   |   |   |   |   |   |   |   |   |   |   |   |
|                                                | The sample contains the following genetic constructs: <b>Luciferase, SV40 large T antigen</b>                                                                                                                                                                                                                                                                                                                                                |                             |              |              |              |              |           |                           |              |               |            |          |      |      |      |       |      |     |   |   |   |   |   |   |   |   |   |   |   |   |   |   |   |   |   |
| Genotyping Quality                             | <b>Excellent (22 N calls)</b><br>All reported results are dependent on genotyping quality.                                                                                                                                                                                                                                                                                                                                                   |                             |              |              |              |              |           |                           |              |               |            |          |      |      |      |       |      |     |   |   |   |   |   |   |   |   |   |   |   |   |   |   |   |   |   |
| Chromosomal Sex                                | XX                                                                                                                                                                                                                                                                                                                                                                                                                                           |                             |              |              |              |              |           |                           |              |               |            |          |      |      |      |       |      |     |   |   |   |   |   |   |   |   |   |   |   |   |   |   |   |   |   |
| Inbreeding Estimate                            | <b>Inbred (16 H calls at autosomal, X, and PAR chromosome markers)</b>                                                                                                                                                                                                                                                                                                                                                                       |                             |              |              |              |              |           |                           |              |               |            |          |      |      |      |       |      |     |   |   |   |   |   |   |   |   |   |   |   |   |   |   |   |   |   |
| Inbreeding and Genotyping Quality (Plot)       | <p>The plot shows the relationship between Inbreeding (H Calls) on the x-axis and Quality (N Calls) on the y-axis. The y-axis has four levels: Excellent (91), Good (234), Questionable (446), and Poor. The x-axis has three regions: Inbred, Close to Inbred, and Outbred. A red dot representing Neogen ID MM0924 is located in the Inbred region at the Excellent level (91 N calls).</p>                                                |                             |              |              |              |              |           |                           |              |               |            |          |      |      |      |       |      |     |   |   |   |   |   |   |   |   |   |   |   |   |   |   |   |   |   |
| Constructs Detected                            | <table><tr><td>BlastR</td><td>bpa</td><td>Cas9</td><td>chlor</td><td>Cre</td><td>DTA</td><td>g-FP</td><td>hCMV_a</td><td>hCMV_b</td><td>hTK_pr</td><td>iCre</td><td>IRES</td><td>Luc</td><td>r-FP</td><td>rtTA</td><td>SV40</td><td>tTA</td></tr><tr><td>-</td><td>-</td><td>-</td><td>-</td><td>-</td><td>-</td><td>-</td><td>-</td><td>-</td><td>-</td><td>-</td><td>-</td><td>+</td><td>-</td><td>-</td><td>+</td><td>-</td></tr></table> | BlastR                      | bpa          | Cas9         | chlor        | Cre          | DTA       | g-FP                      | hCMV_a       | hCMV_b        | hTK_pr     | iCre     | IRES | Luc  | r-FP | rtTA  | SV40 | tTA | - | - | - | - | - | - | - | - | - | - | - | - | + | - | - | + | - |
| BlastR                                         | bpa                                                                                                                                                                                                                                                                                                                                                                                                                                          | Cas9                        | chlor        | Cre          | DTA          | g-FP         | hCMV_a    | hCMV_b                    | hTK_pr       | iCre          | IRES       | Luc      | r-FP | rtTA | SV40 | tTA   |      |     |   |   |   |   |   |   |   |   |   |   |   |   |   |   |   |   |   |
| -                                              | -                                                                                                                                                                                                                                                                                                                                                                                                                                            | -                           | -            | -            | -            | -            | -         | -                         | -            | -             | -          | +        | -    | -    | +    | -     |      |     |   |   |   |   |   |   |   |   |   |   |   |   |   |   |   |   |   |
| Primary Background (Autosomes, X Chromosome)   | <table><tr><th>Strain</th><th>Total</th><th>Consistent</th><th>Inconsistent</th><th>Heterozygous</th><th>Excluded</th></tr><tr><td>multiple FVB/N substrains</td><td>9721</td><td>9425 (100.0%)</td><td>0 (0.0%)</td><td>4 (0.0%)</td><td>292</td></tr></table>                                                                                                                                                                              | Strain                      | Total        | Consistent   | Inconsistent | Heterozygous | Excluded  | multiple FVB/N substrains | 9721         | 9425 (100.0%) | 0 (0.0%)   | 4 (0.0%) | 292  |      |      |       |      |     |   |   |   |   |   |   |   |   |   |   |   |   |   |   |   |   |   |
| Strain                                         | Total                                                                                                                                                                                                                                                                                                                                                                                                                                        | Consistent                  | Inconsistent | Heterozygous | Excluded     |              |           |                           |              |               |            |          |      |      |      |       |      |     |   |   |   |   |   |   |   |   |   |   |   |   |   |   |   |   |   |
| multiple FVB/N substrains                      | 9721                                                                                                                                                                                                                                                                                                                                                                                                                                         | 9425 (100.0%)               | 0 (0.0%)     | 4 (0.0%)     | 292          |              |           |                           |              |               |            |          |      |      |      |       |      |     |   |   |   |   |   |   |   |   |   |   |   |   |   |   |   |   |   |
| Secondary Background (Autosomes, X Chromosome) | Not Applicable                                                                                                                                                                                                                                                                                                                                                                                                                               |                             |              |              |              |              |           |                           |              |               |            |          |      |      |      |       |      |     |   |   |   |   |   |   |   |   |   |   |   |   |   |   |   |   |   |
| Background Ideogram                            | <p>The ideogram shows the distribution of genetic markers across chromosomes 1 to 19 and the X chromosome. The y-axis represents the number of markers, ranging from 0 to 200 Mb. The legend indicates three categories: Primary (black), Inconsistent (light gray), and Heterozygous (dark gray). The Primary category is the most prominent across all chromosomes.</p>                                                                    |                             |              |              |              |              |           |                           |              |               |            |          |      |      |      |       |      |     |   |   |   |   |   |   |   |   |   |   |   |   |   |   |   |   |   |
| Backgrounds Detected (Diagnostic Alleles)      | <table><tr><th colspan="5">Diagnostic Alleles Observed</th></tr><tr><th>Substrain</th><th>Homozygous</th><th>Heterozygous</th><th>Potential</th><th>% Observed</th></tr><tr><td>FVB/NJ</td><td>67</td><td>8</td><td>79</td><td>94.9%</td></tr></table>                                                                                                                                                                                       | Diagnostic Alleles Observed |              |              |              |              | Substrain | Homozygous                | Heterozygous | Potential     | % Observed | FVB/NJ   | 67   | 8    | 79   | 94.9% |      |     |   |   |   |   |   |   |   |   |   |   |   |   |   |   |   |   |   |
| Diagnostic Alleles Observed                    |                                                                                                                                                                                                                                                                                                                                                                                                                                              |                             |              |              |              |              |           |                           |              |               |            |          |      |      |      |       |      |     |   |   |   |   |   |   |   |   |   |   |   |   |   |   |   |   |   |
| Substrain                                      | Homozygous                                                                                                                                                                                                                                                                                                                                                                                                                                   | Heterozygous                | Potential    | % Observed   |              |              |           |                           |              |               |            |          |      |      |      |       |      |     |   |   |   |   |   |   |   |   |   |   |   |   |   |   |   |   |   |
| FVB/NJ                                         | 67                                                                                                                                                                                                                                                                                                                                                                                                                                           | 8                           | 79           | 94.9%        |              |              |           |                           |              |               |            |          |      |      |      |       |      |     |   |   |   |   |   |   |   |   |   |   |   |   |   |   |   |   |   |
