# Supplementary material
Source: publisher figshare collection journal article supplement (https://gsajournals.figshare.com/articles/dataset/_/11971941)
Supplement: Supplementary file 9 [file 1]

MiniMUGA Background Analysis v0008

| Sample ID                                      | SK_MLE12_F001                                                                                                                                                                                                                                                                                                                                                                                                                                |               |              |              |              |              |          |          |        |               |          |          |      |      |      |      |      |     |   |   |   |   |   |   |   |   |   |   |   |   |   |   |   |   |   |
|------------------------------------------------|----------------------------------------------------------------------------------------------------------------------------------------------------------------------------------------------------------------------------------------------------------------------------------------------------------------------------------------------------------------------------------------------------------------------------------------------|---------------|--------------|--------------|--------------|--------------|----------|----------|--------|---------------|----------|----------|------|------|------|------|------|-----|---|---|---|---|---|---|---|---|---|---|---|---|---|---|---|---|---|
| Neogen ID                                      | TP7668                                                                                                                                                                                                                                                                                                                                                                                                                                       |               |              |              |              |              |          |          |        |               |          |          |      |      |      |      |      |     |   |   |   |   |   |   |   |   |   |   |   |   |   |   |   |   |   |
| Summary                                        | The genotype of this sample is of <b>excellent</b> quality. It is <b>female</b> and <b>inbred</b> , and likely a <b>FVB/NTac</b> mouse.                                                                                                                                                                                                                                                                                                      |               |              |              |              |              |          |          |        |               |          |          |      |      |      |      |      |     |   |   |   |   |   |   |   |   |   |   |   |   |   |   |   |   |   |
|                                                | The sample contains the following genetic constructs: <b>SV40 large T antigen</b>                                                                                                                                                                                                                                                                                                                                                            |               |              |              |              |              |          |          |        |               |          |          |      |      |      |      |      |     |   |   |   |   |   |   |   |   |   |   |   |   |   |   |   |   |   |
| Genotyping Quality                             | <b>Excellent (11 N calls)</b><br>All reported results are dependent on genotyping quality.                                                                                                                                                                                                                                                                                                                                                   |               |              |              |              |              |          |          |        |               |          |          |      |      |      |      |      |     |   |   |   |   |   |   |   |   |   |   |   |   |   |   |   |   |   |
| Chromosomal Sex                                | XX                                                                                                                                                                                                                                                                                                                                                                                                                                           |               |              |              |              |              |          |          |        |               |          |          |      |      |      |      |      |     |   |   |   |   |   |   |   |   |   |   |   |   |   |   |   |   |   |
| Inbreeding Estimate                            | <b>Inbred (5 H calls at autosomal, X, and PAR chromosome markers)</b>                                                                                                                                                                                                                                                                                                                                                                        |               |              |              |              |              |          |          |        |               |          |          |      |      |      |      |      |     |   |   |   |   |   |   |   |   |   |   |   |   |   |   |   |   |   |
| Inbreeding and Genotyping Quality (Plot)       | 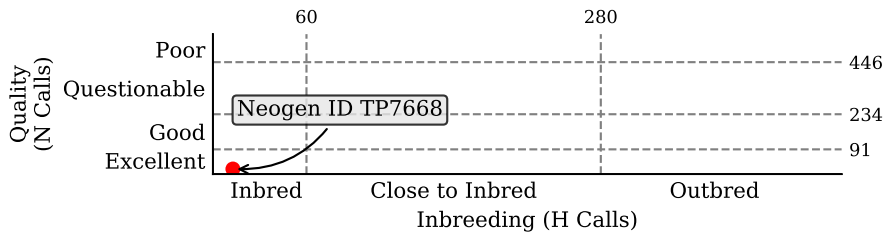                                                                                                                                                                                                                                                                                                                                                           |               |              |              |              |              |          |          |        |               |          |          |      |      |      |      |      |     |   |   |   |   |   |   |   |   |   |   |   |   |   |   |   |   |   |
| Constructs Detected                            | <table><tr><td>BlastR</td><td>bpa</td><td>Cas9</td><td>chlor</td><td>Cre</td><td>DTA</td><td>g_FP</td><td>hCMV_a</td><td>hCMV_b</td><td>hTK_pr</td><td>iCre</td><td>IRES</td><td>Luc</td><td>r_FP</td><td>rtTA</td><td>SV40</td><td>tTA</td></tr><tr><td>-</td><td>-</td><td>-</td><td>-</td><td>-</td><td>-</td><td>-</td><td>-</td><td>-</td><td>-</td><td>-</td><td>-</td><td>-</td><td>-</td><td>-</td><td>+</td><td>-</td></tr></table> | BlastR        | bpa          | Cas9         | chlor        | Cre          | DTA      | g_FP     | hCMV_a | hCMV_b        | hTK_pr   | iCre     | IRES | Luc  | r_FP | rtTA | SV40 | tTA | - | - | - | - | - | - | - | - | - | - | - | - | - | - | - | + | - |
| BlastR                                         | bpa                                                                                                                                                                                                                                                                                                                                                                                                                                          | Cas9          | chlor        | Cre          | DTA          | g_FP         | hCMV_a   | hCMV_b   | hTK_pr | iCre          | IRES     | Luc      | r_FP | rtTA | SV40 | tTA  |      |     |   |   |   |   |   |   |   |   |   |   |   |   |   |   |   |   |   |
| -                                              | -                                                                                                                                                                                                                                                                                                                                                                                                                                            | -             | -            | -            | -            | -            | -        | -        | -      | -             | -        | -        | -    | -    | +    | -    |      |     |   |   |   |   |   |   |   |   |   |   |   |   |   |   |   |   |   |
| Primary Background (Autosomes, X Chromosome)   | <table><tr><th>Strain</th><th>Total</th><th>Consistent</th><th>Inconsistent</th><th>Heterozygous</th><th>Excluded</th></tr><tr><td>FVB/NTac</td><td>8913</td><td>8786 (100.0%)</td><td>3 (0.0%)</td><td>0 (0.0%)</td><td>124</td></tr></table>                                                                                                                                                                                               | Strain        | Total        | Consistent   | Inconsistent | Heterozygous | Excluded | FVB/NTac | 8913   | 8786 (100.0%) | 3 (0.0%) | 0 (0.0%) | 124  |      |      |      |      |     |   |   |   |   |   |   |   |   |   |   |   |   |   |   |   |   |   |
| Strain                                         | Total                                                                                                                                                                                                                                                                                                                                                                                                                                        | Consistent    | Inconsistent | Heterozygous | Excluded     |              |          |          |        |               |          |          |      |      |      |      |      |     |   |   |   |   |   |   |   |   |   |   |   |   |   |   |   |   |   |
| FVB/NTac                                       | 8913                                                                                                                                                                                                                                                                                                                                                                                                                                         | 8786 (100.0%) | 3 (0.0%)     | 0 (0.0%)     | 124          |              |          |          |        |               |          |          |      |      |      |      |      |     |   |   |   |   |   |   |   |   |   |   |   |   |   |   |   |   |   |
| Secondary Background (Autosomes, X Chromosome) | Not Applicable                                                                                                                                                                                                                                                                                                                                                                                                                               |               |              |              |              |              |          |          |        |               |          |          |      |      |      |      |      |     |   |   |   |   |   |   |   |   |   |   |   |   |   |   |   |   |   |
| Background Ideogram                            |                                                                                                                                                                                                                                                                                                                                                          |               |              |              |              |              |          |          |        |               |          |          |      |      |      |      |      |     |   |   |   |   |   |   |   |   |   |   |   |   |   |   |   |   |   |
| Backgrounds Detected (Diagnostic Alleles)      | No Backgrounds Detected via Diagnostic Alleles                                                                                                                                                                                                                                                                                                                                                                                               |               |              |              |              |              |          |          |        |               |          |          |      |      |      |      |      |     |   |   |   |   |   |   |   |   |   |   |   |   |   |   |   |   |   |
