# Supplementary material
Source: publisher figshare collection journal article supplement (https://gsajournals.figshare.com/articles/dataset/_/11971941)
Supplement: Supplementary file 10 [file 1]

Sample Cr\_CS02\_M\_244, X chr all markers position > 160Mb

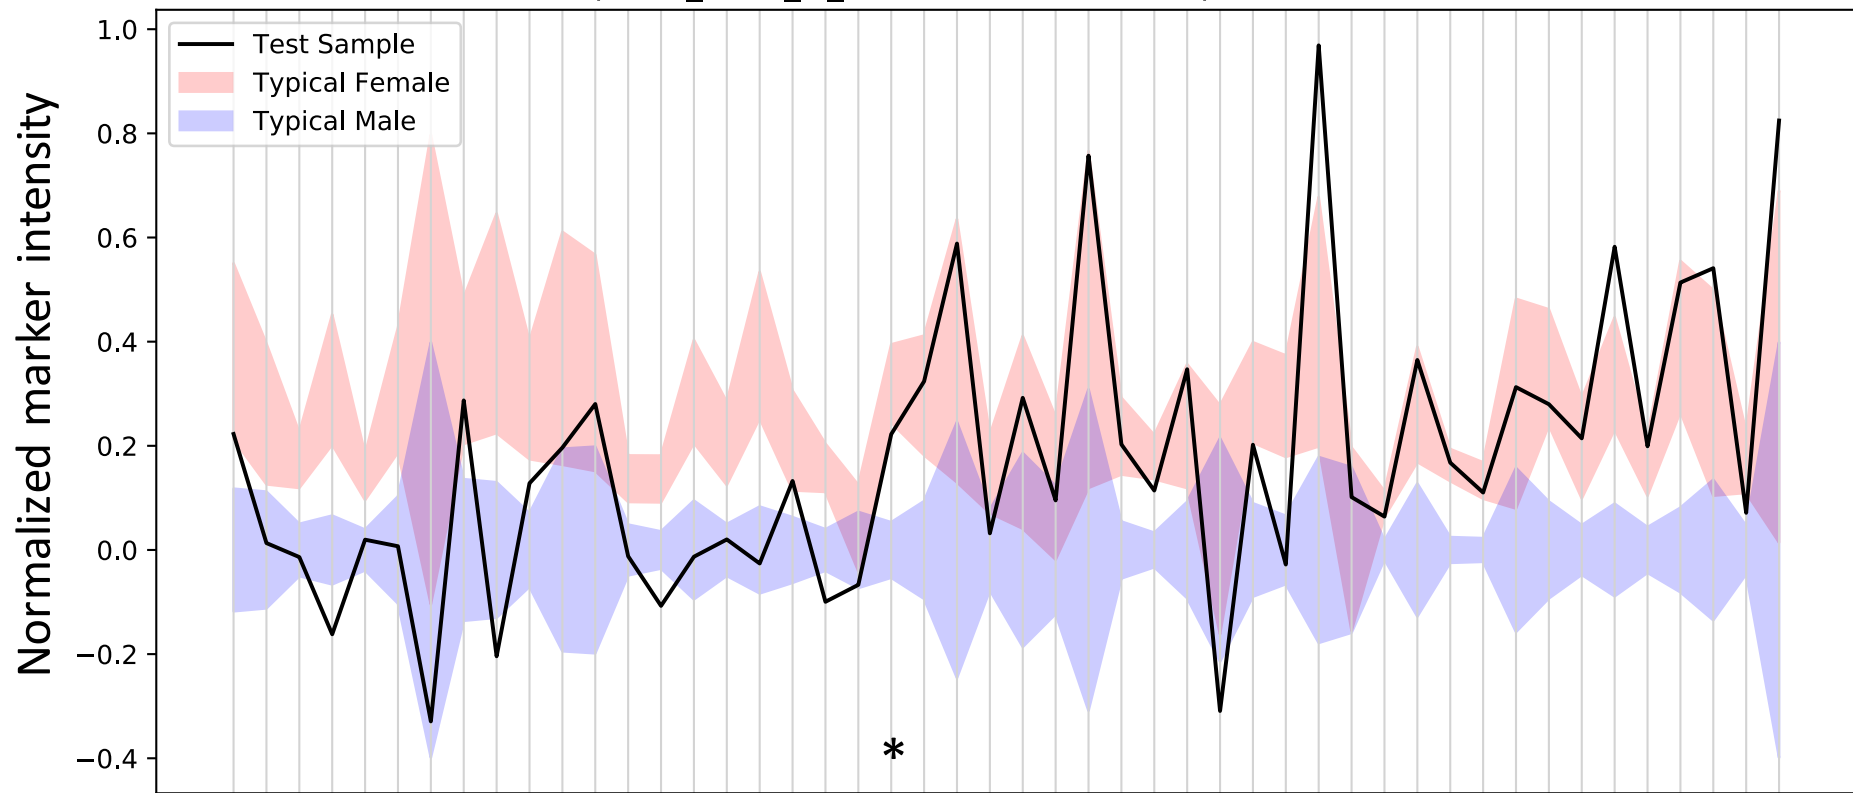

|               |   |   |   |   |   |   |   |   |   |   |   |   |   |   |   |   |   |   |   |   |   |   |   |   |   |   |   |   |   |   |   |   |   |   |   |   |   |   |   |   |   |   |   |   |   |   |   |   |
|---------------|---|---|---|---|---|---|---|---|---|---|---|---|---|---|---|---|---|---|---|---|---|---|---|---|---|---|---|---|---|---|---|---|---|---|---|---|---|---|---|---|---|---|---|---|---|---|---|---|
| CC029/Unc     | A | A | C | G | G | A | T | C | T | C | C | C | A | T | G | C | C | C | T | C | G | T | T | N | G | T | C | C | T | C | T | A | G | G | C | C | T | T | A | G | T | C | A | T | G | G |   |   |
| Cr_CS02_M_244 | A | A | C | C | G | G | G | A | G | T | T | T | C | C | A | A | C | T | C | C | T | C | H | T | H | N | H | T | C | H | T | C | T | H | G | G | C | C | T | H | A | H | T | C | H | H | G | H |
| CC030/GeniUnc | A | A | C | C | G | G | G | A | G | T | T | T | C | C | A | A | C | T | C | C | T | C | T | T | C | N | A | T | C | T | T | C | T | T | G | G | C | C | T | G | A | C | T | C | T | C | G | A |

←
→
 Duplication
 ←

←
→
 163,416,196
 ←
→
 169,454,751
