# Supplementary material
Source: publisher figshare collection journal article supplement (https://gsajournals.figshare.com/articles/dataset/_/11971941)

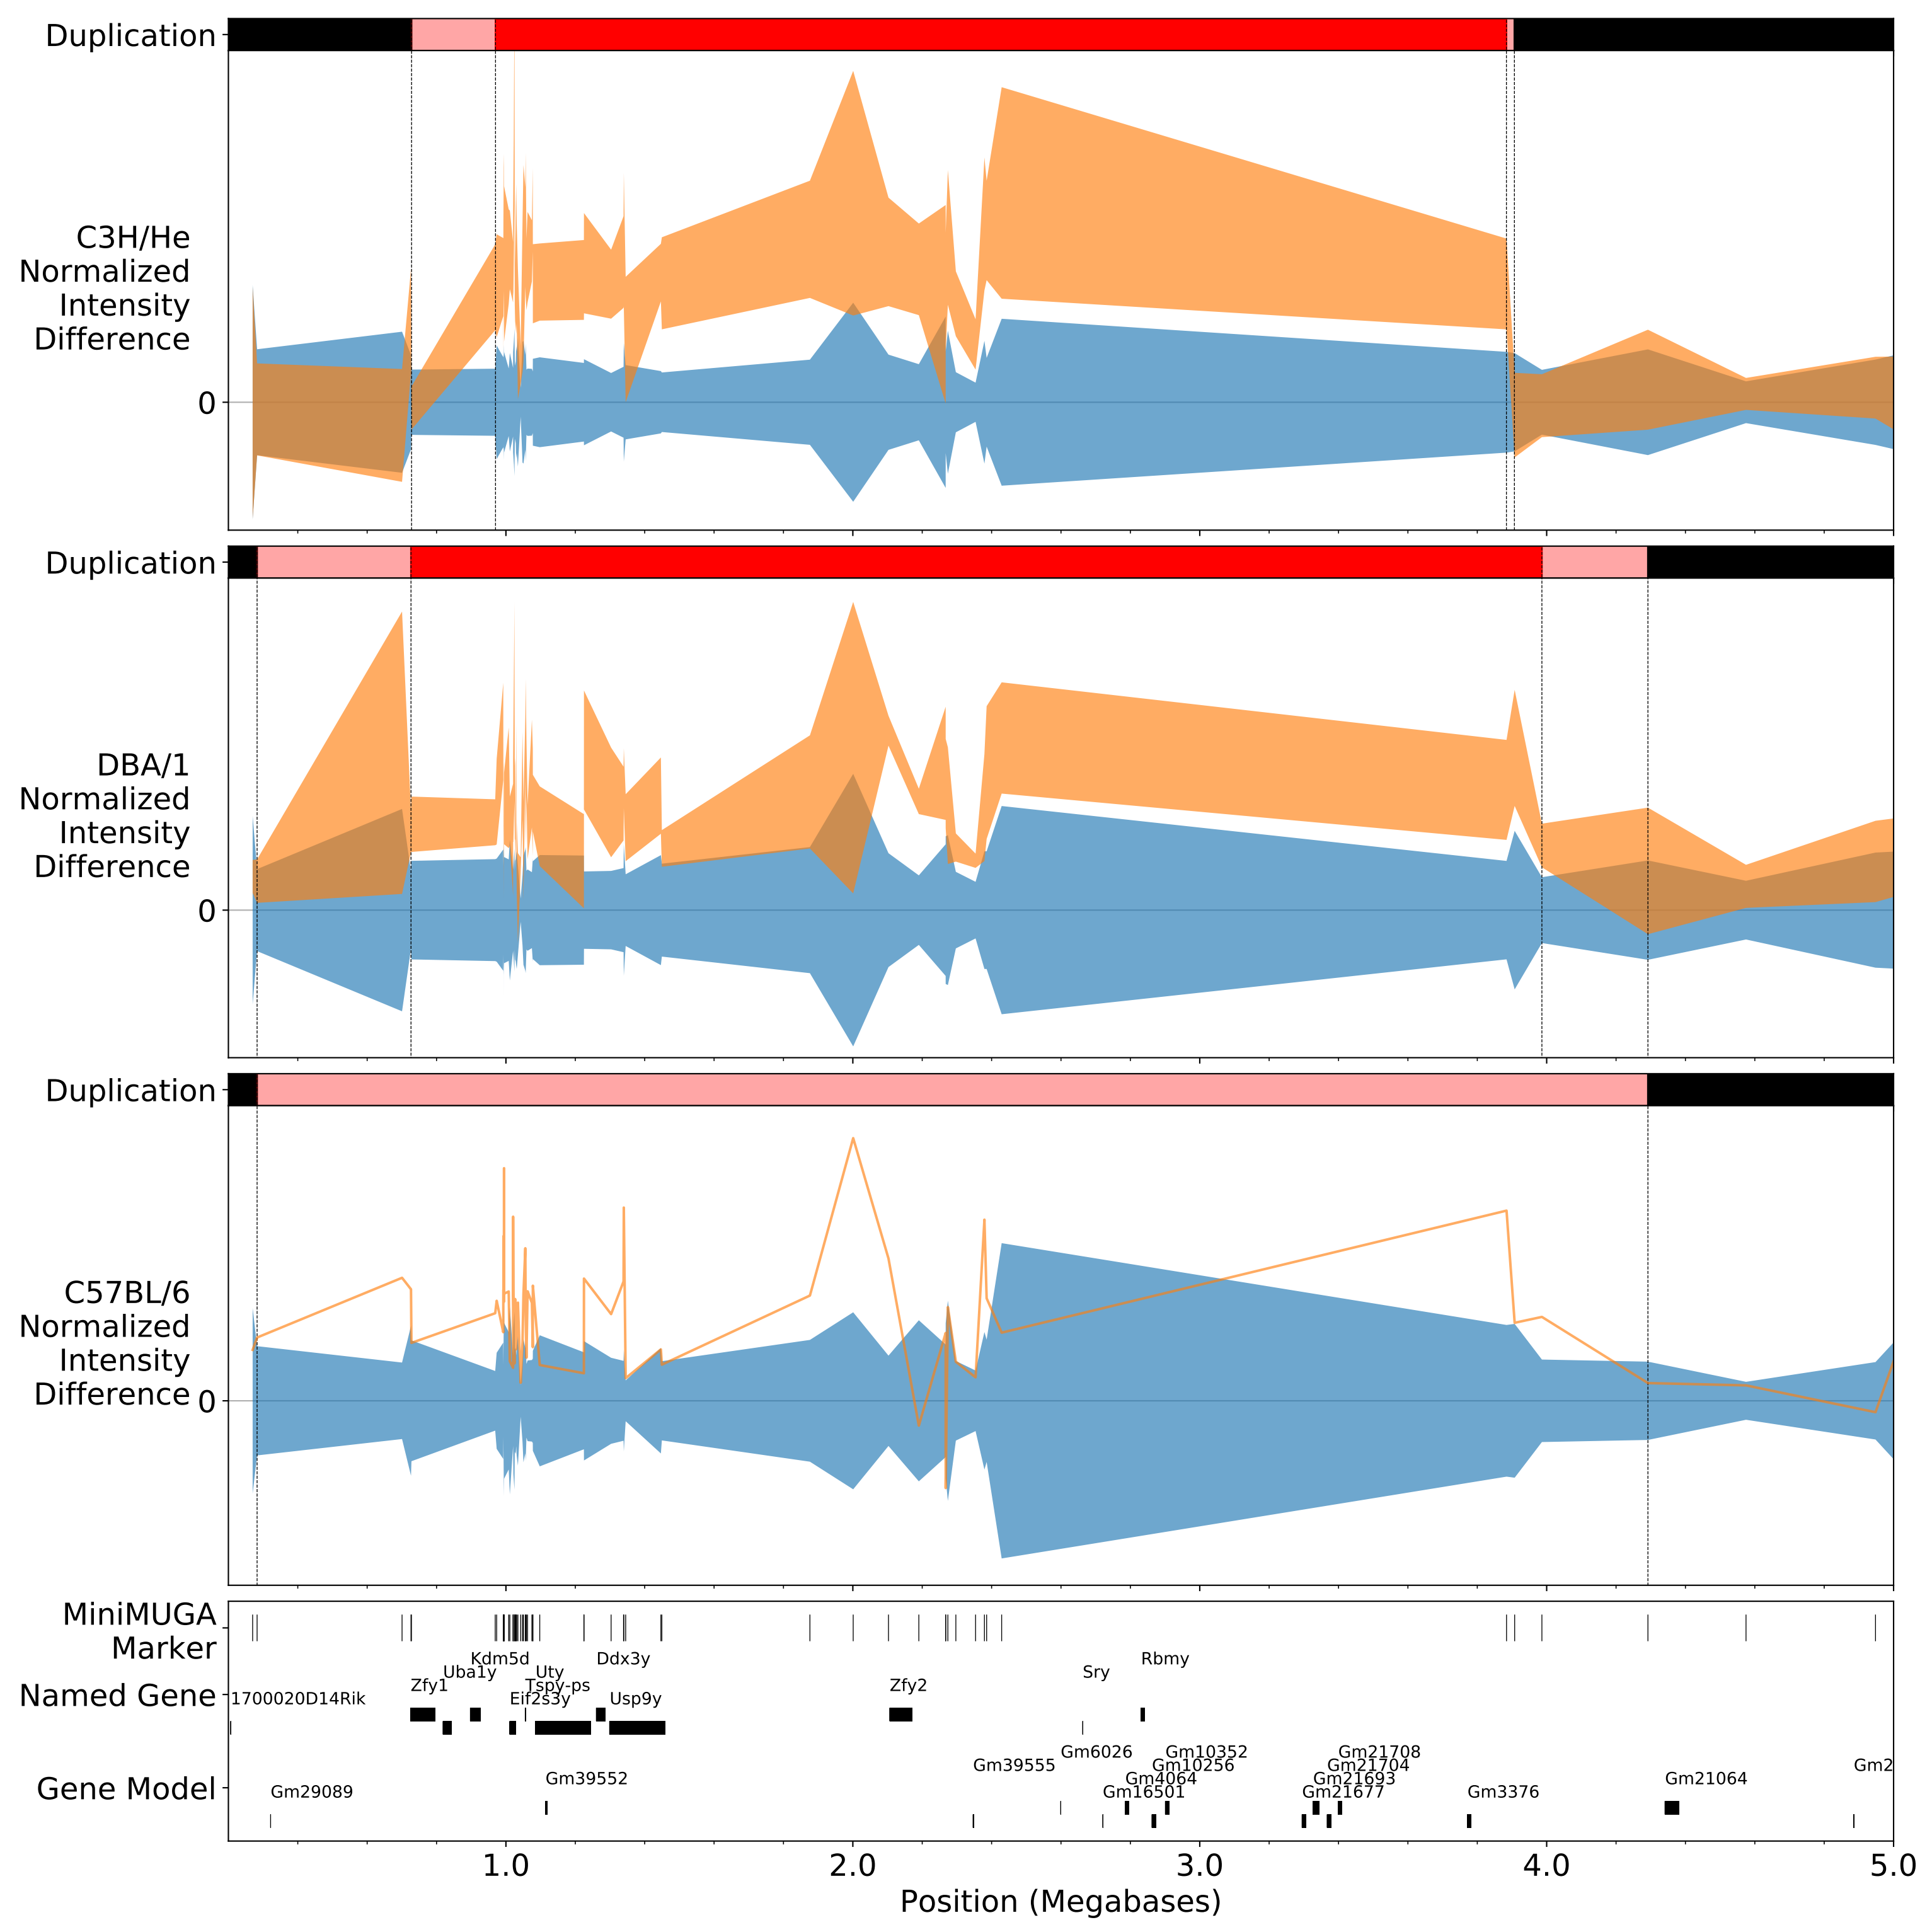

Supplement: Supplementary file 2 [file 1]

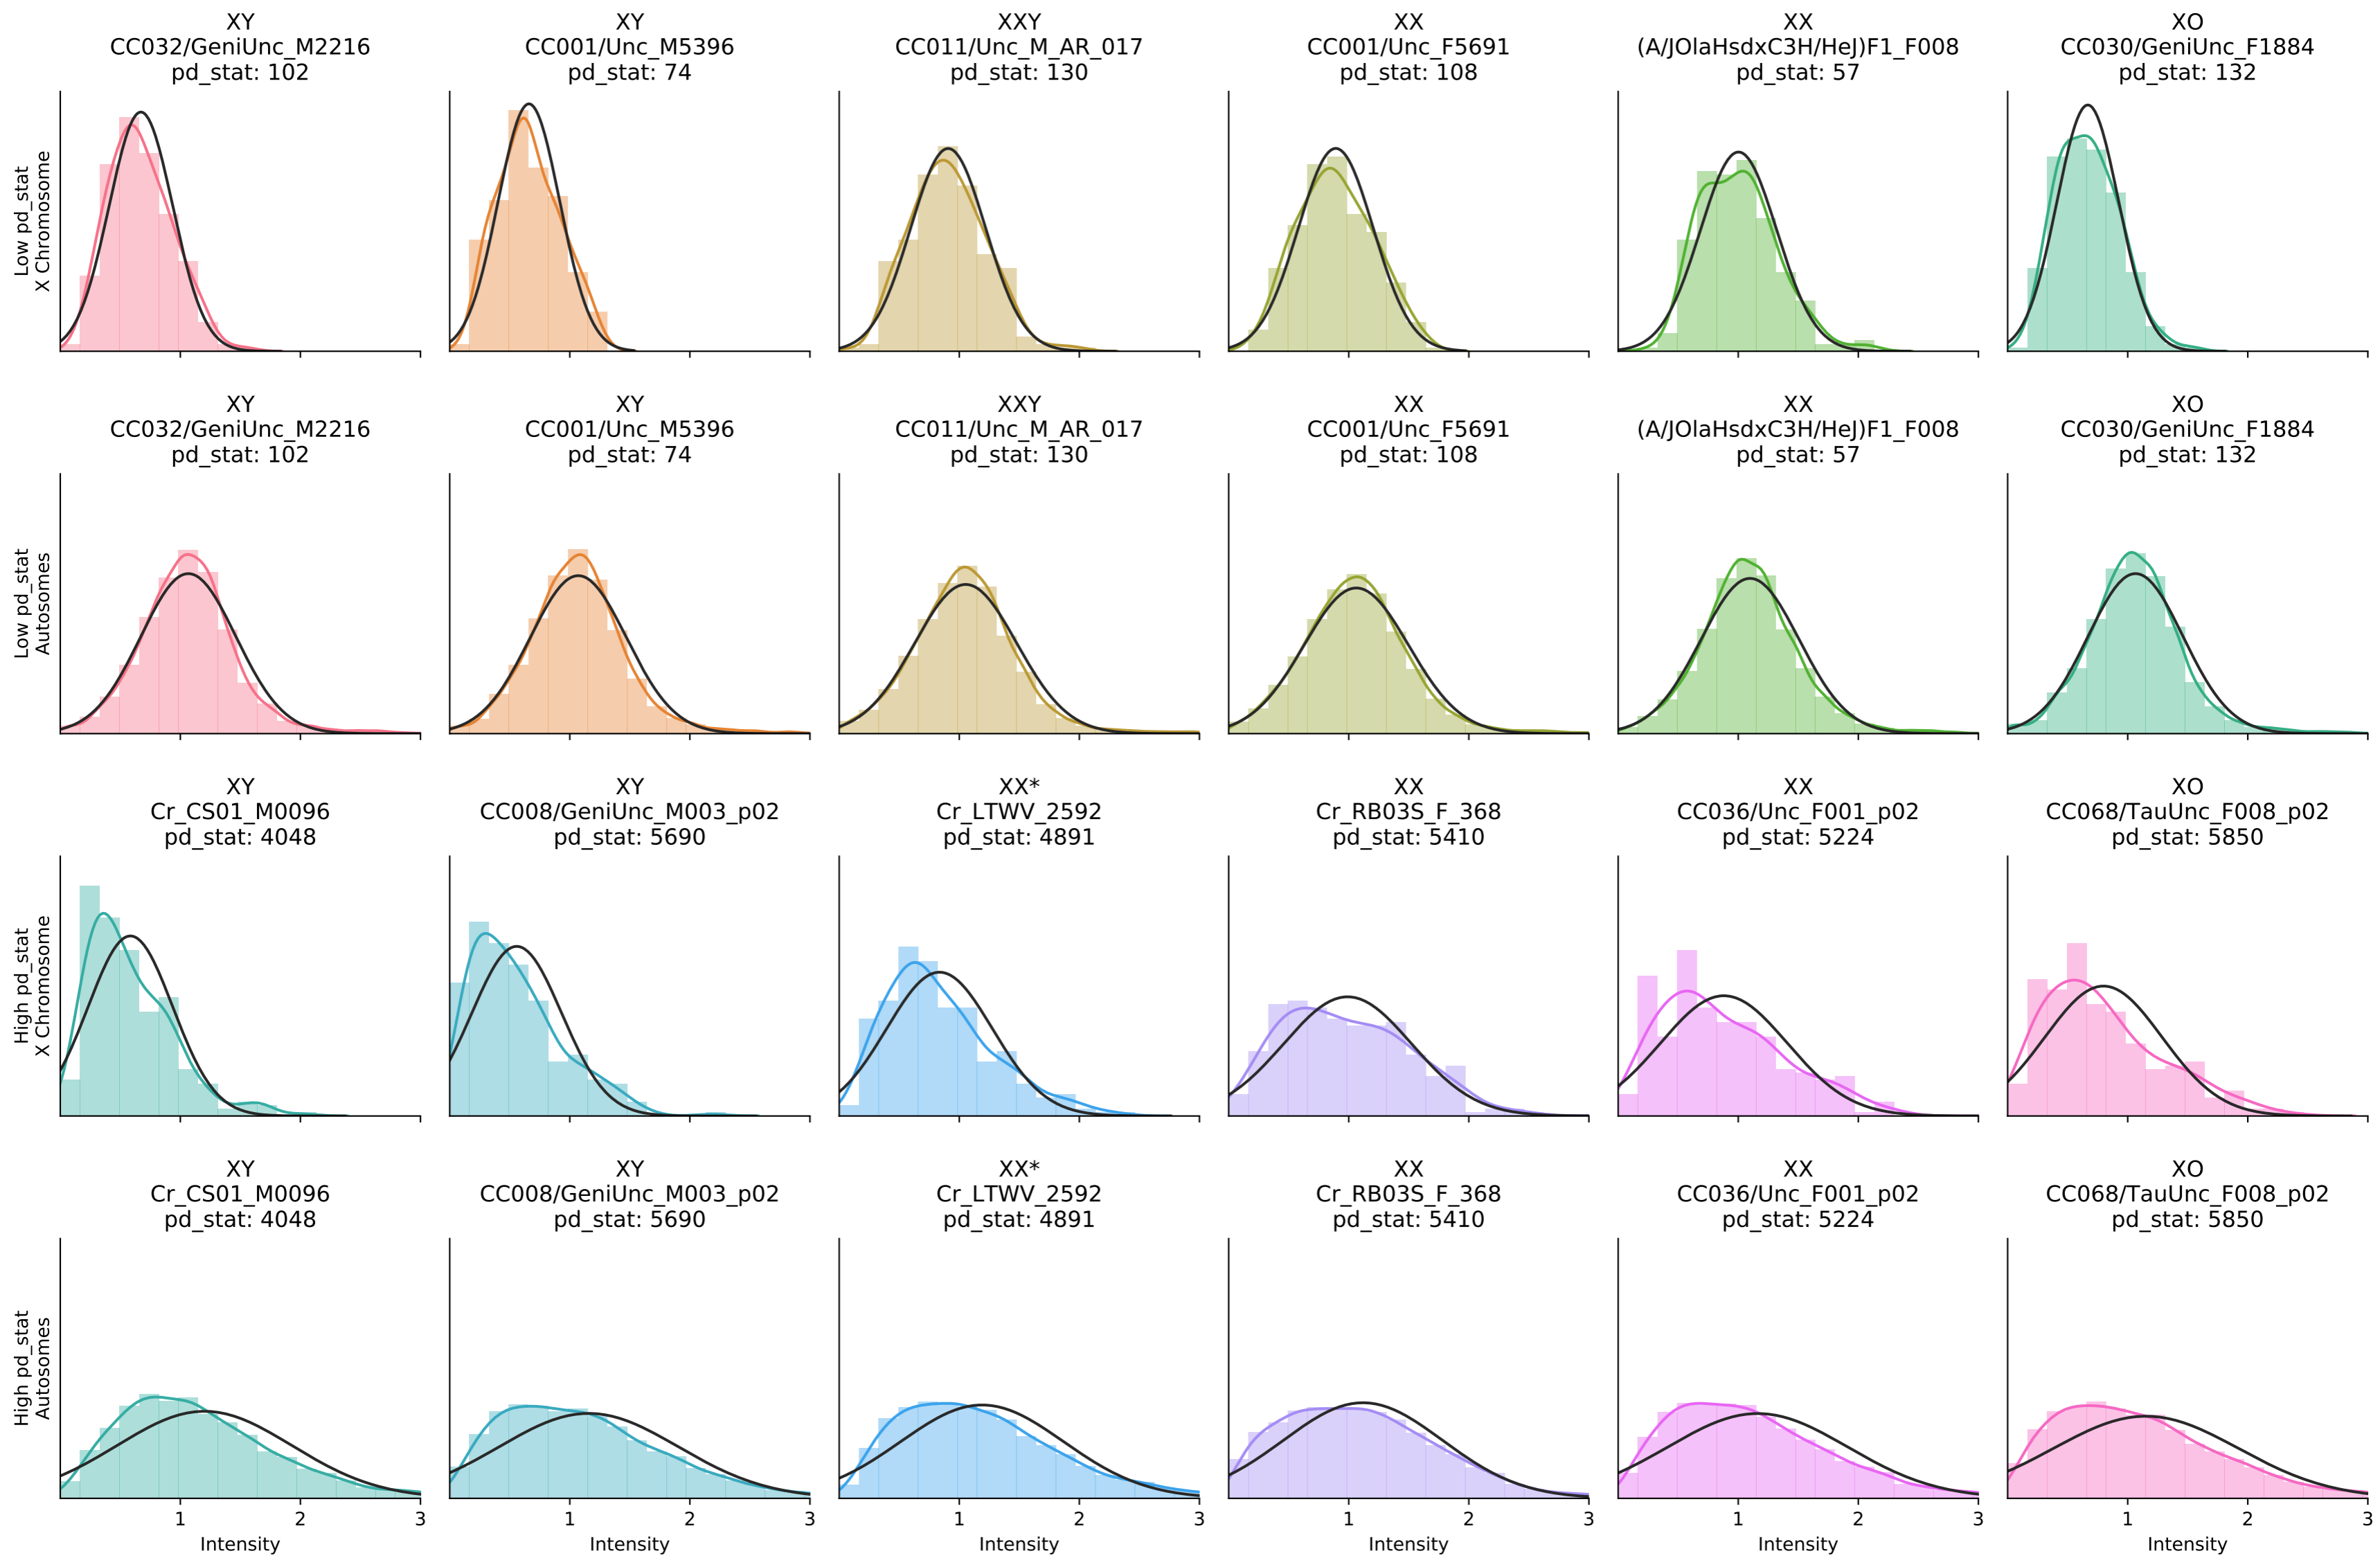

Supplement: Supplementary file 4 [file 1]

Sex Informative

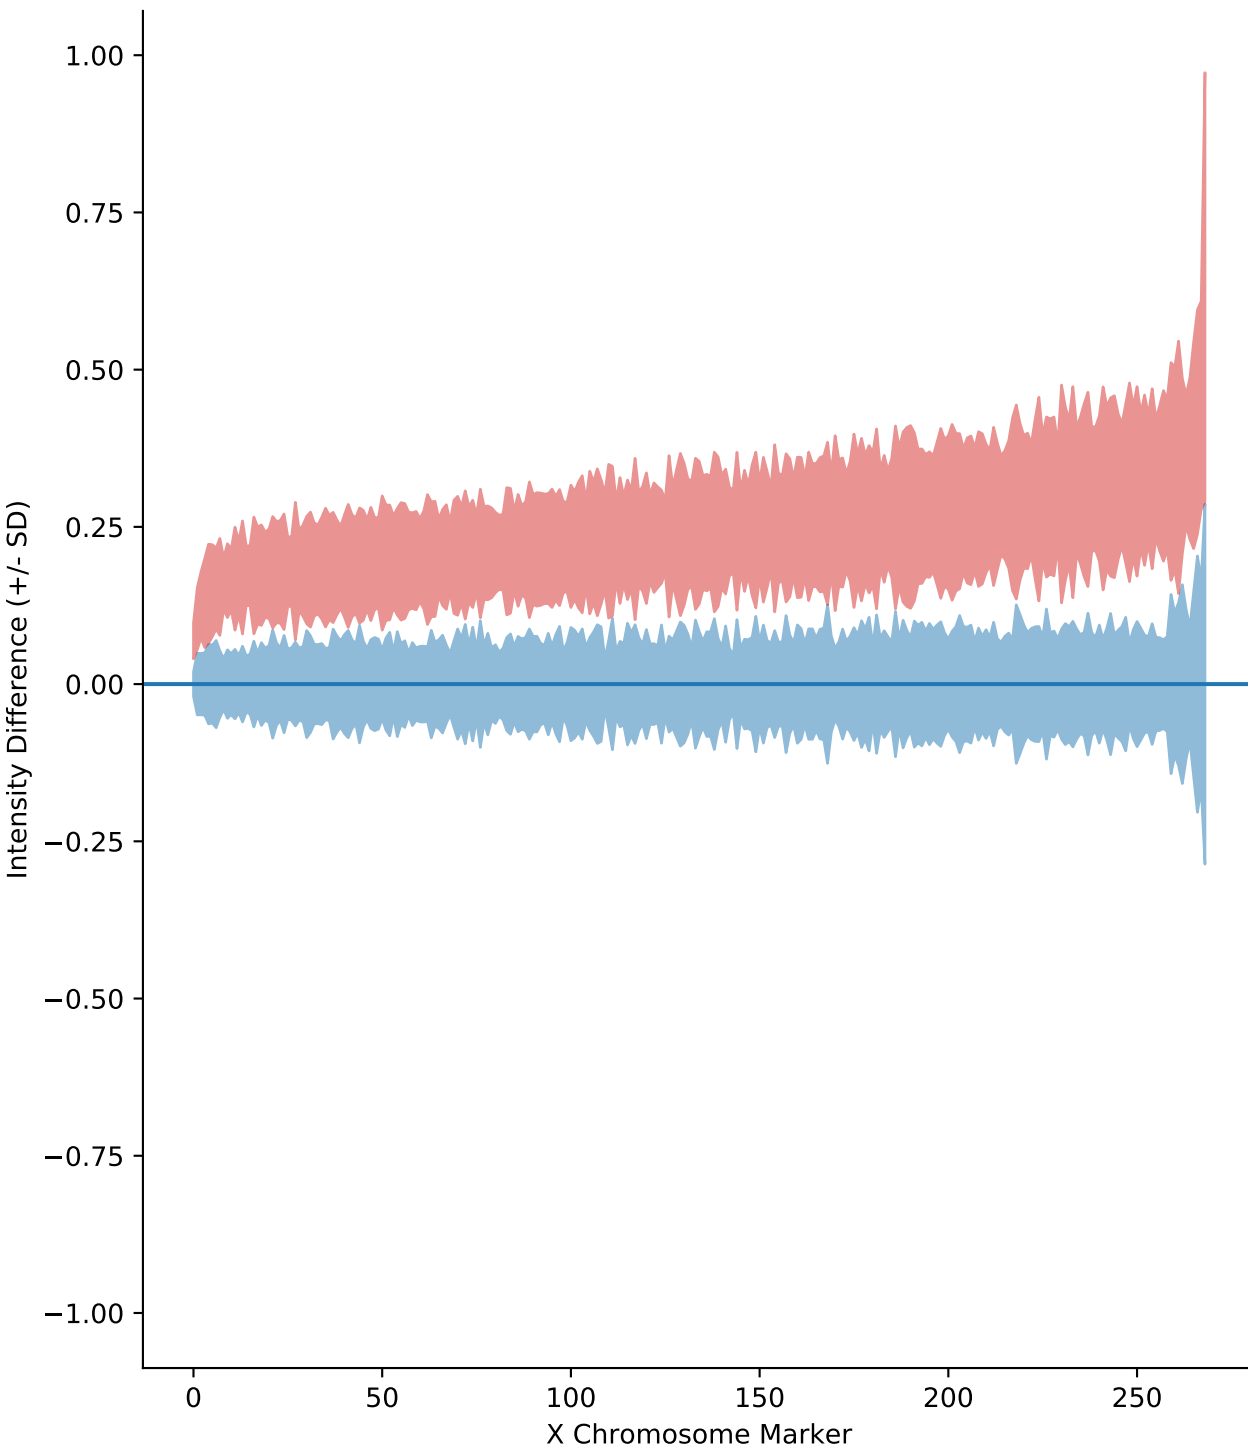

Not Sex Informative

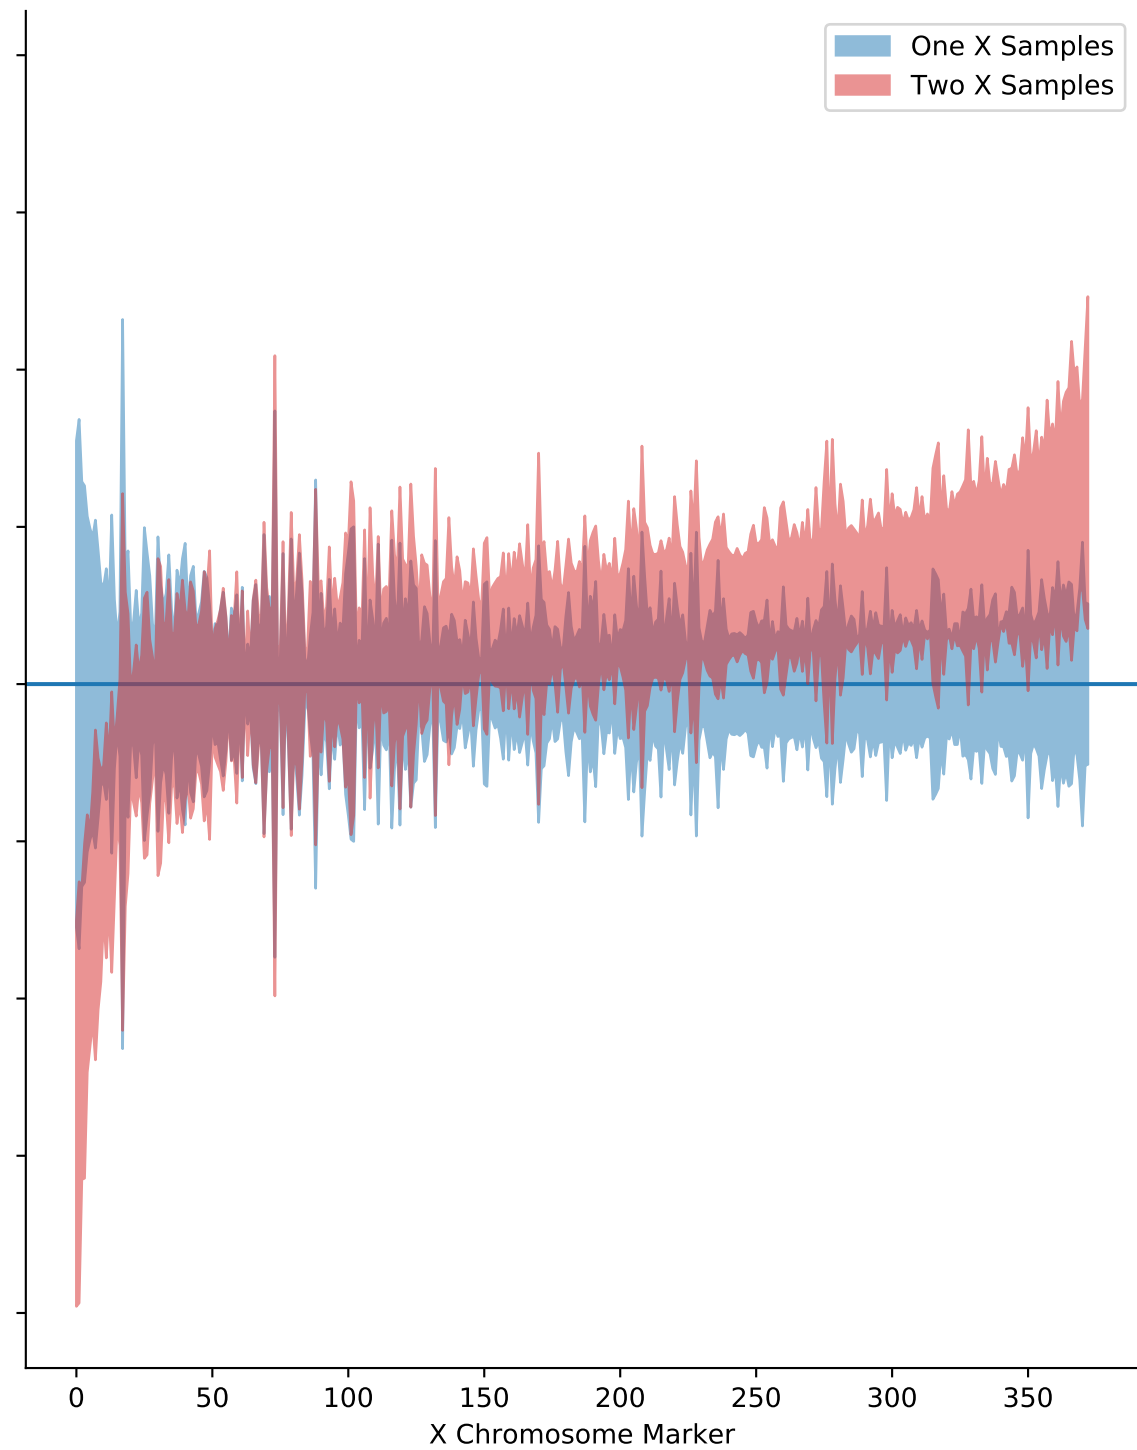

One X Samples  
Two X Samples

Supplement: Supplementary file 5 [file 1]

Number of Samples

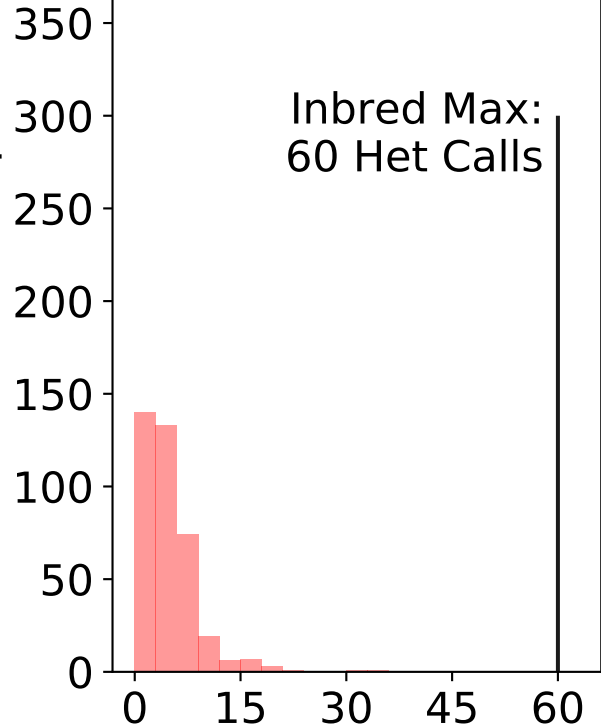

H calls in  
385 Inbred Samples

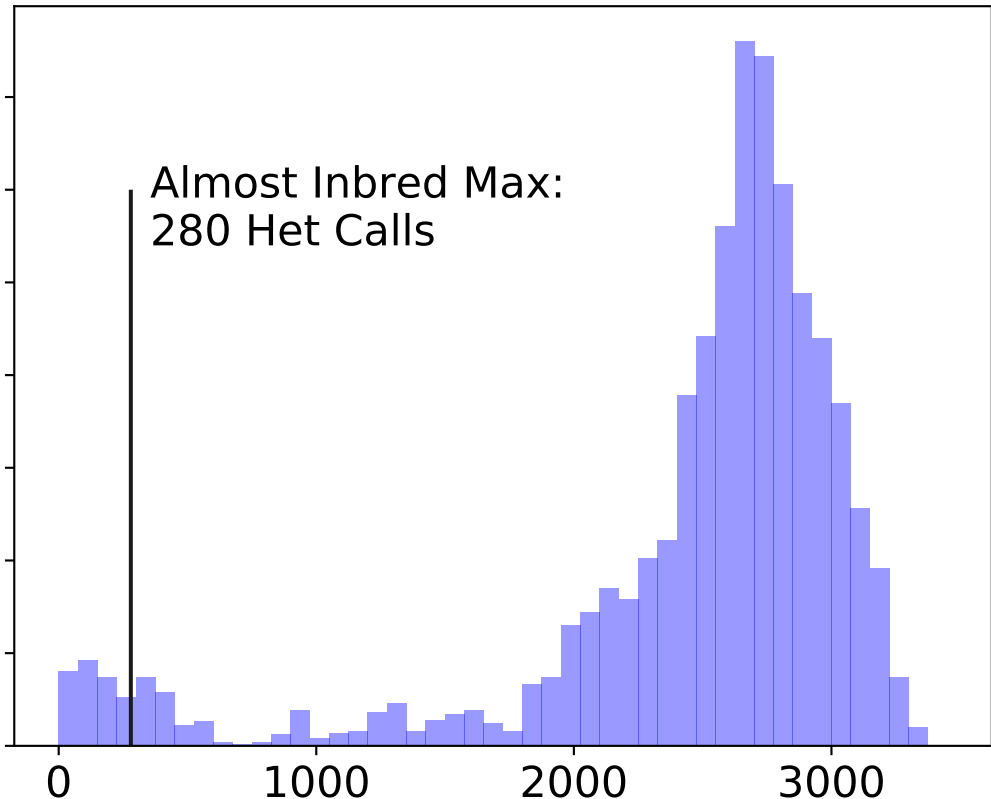

Predicted H calls in  
3,655 in silico F1 hybrid samples

Supplement: Supplementary file 7 [file 1]
